# Supplementary material
Source: MDPI journal article supplement (https://www.mdpi.com/2076-3417/12/21/10787)
Supplement: s1 [file s1]

**Table S1.** Comparison of CNN models using dataset 1 with respect to accuracy, RMSE, weighted kappa (with standard deviation).

| CNN Model    | Epochs | 70%-30% distribution |                |                | 10-fold cross-validation |                |                |
|--------------|--------|----------------------|----------------|----------------|--------------------------|----------------|----------------|
|              |        | Accuracy (%)         | RMSE           | Weighted Kappa | Accuracy (%)             | RMSE           | Weighted Kappa |
| VGG-19       | 10     | 84.53                | 0.2577         | 0.8318         | 85.64                    | 0.2466         | 0.8429         |
|              |        | ( $\pm 0.03$ )       | ( $\pm 0.04$ ) | ( $\pm 0.04$ ) | ( $\pm 0.04$ )           | ( $\pm 0.04$ ) | ( $\pm 0.03$ ) |
|              | 20     | 85.74                | 0.2456         | 0.8439         | 86.78                    | 0.2352         | 0.8543         |
|              |        | ( $\pm 0.04$ )       | ( $\pm 0.05$ ) | ( $\pm 0.04$ ) | ( $\pm 0.04$ )           | ( $\pm 0.04$ ) | ( $\pm 0.03$ ) |
|              | 30     | 87.21                | 0.2309         | 0.8586         | 86.95                    | 0.2335         | 0.8560         |
| ResNet-50    | 10     | 90.23                | 0.2007         | 0.8888         | 95.23                    | 0.1407         | 0.9488         |
|              |        | ( $\pm 0.04$ )       | ( $\pm 0.04$ ) | ( $\pm 0.04$ ) | ( $\pm 0.04$ )           | ( $\pm 0.04$ ) | ( $\pm 0.04$ ) |
|              | 20     | 90.45                | 0.1985         | 0.8910         | 96.59                    | 0.1271         | 0.9624         |
|              |        | ( $\pm 0.04$ )       | ( $\pm 0.04$ ) | ( $\pm 0.04$ ) | ( $\pm 0.04$ )           | ( $\pm 0.04$ ) | ( $\pm 0.04$ ) |
|              | 30     | 93.54                | 0.1676         | 0.9219         | 97.13                    | 0.1217         | 0.9678         |
| Inception-V3 | 10     | 93.45                | 0.1685         | 0.9210         | 95.76                    | 0.1454         | 0.9441         |
|              |        | ( $\pm 0.04$ )       | ( $\pm 0.04$ ) | ( $\pm 0.04$ ) | ( $\pm 0.04$ )           | ( $\pm 0.03$ ) | ( $\pm 0.04$ ) |
|              | 20     | 94.51                | 0.1579         | 0.9316         | 96.45                    | 0.1385         | 0.9510         |
|              |        | ( $\pm 0.04$ )       | ( $\pm 0.04$ ) | ( $\pm 0.04$ ) | ( $\pm 0.04$ )           | ( $\pm 0.03$ ) | ( $\pm 0.04$ ) |
|              | 30     | 94.98                | 0.1532         | 0.9363         | 98.78                    | 0.1152         | 0.9743         |
| Inception-V3 | 10     | 93.45                | 0.1685         | 0.9210         | 95.76                    | 0.1454         | 0.9441         |
|              |        | ( $\pm 0.04$ )       | ( $\pm 0.04$ ) | ( $\pm 0.04$ ) | ( $\pm 0.04$ )           | ( $\pm 0.03$ ) | ( $\pm 0.04$ ) |
|              | 20     | 94.51                | 0.1579         | 0.9316         | 96.45                    | 0.1385         | 0.9510         |
|              |        | ( $\pm 0.04$ )       | ( $\pm 0.04$ ) | ( $\pm 0.04$ ) | ( $\pm 0.04$ )           | ( $\pm 0.03$ ) | ( $\pm 0.04$ ) |
|              | 30     | 94.98                | 0.1532         | 0.9363         | 98.78                    | 0.1152         | 0.9743         |

**Table S2.** Comparison of CNN models using dataset 1 with respect to TP-Rate/Recall, FP-Rate, F-measure (with standard deviation).

| CNN Model    | Epochs | 70%-30% distribution |                |                |                | 10-fold cross-validation |                |                |                |
|--------------|--------|----------------------|----------------|----------------|----------------|--------------------------|----------------|----------------|----------------|
|              |        | TP-Rate / Recall (%) | FP-Rate (%)    | Precision (%)  | F-measure (%)  | TP-Rate / Recall (%)     | FP-Rate (%)    | Precision (%)  | F-measure (%)  |
| VGG-19       | 10     | 84.18                | 15.47          | 84.14          | 84.16          | 85.29                    | 14.36          | 85.25          | 85.27          |
|              |        | ( $\pm 0.04$ )       | ( $\pm 0.04$ ) | ( $\pm 0.04$ ) | ( $\pm 0.03$ ) | ( $\pm 0.04$ )           | ( $\pm 0.04$ ) | ( $\pm 0.04$ ) | ( $\pm 0.03$ ) |
|              | 20     | 85.39                | 14.26          | 85.35          | 85.37          | 86.43                    | 13.22          | 86.39          | 86.41          |
|              |        | ( $\pm 0.04$ )       | ( $\pm 0.04$ ) | ( $\pm 0.04$ ) | ( $\pm 0.03$ ) | ( $\pm 0.05$ )           | ( $\pm 0.04$ ) | ( $\pm 0.04$ ) | ( $\pm 0.03$ ) |
|              | 30     | 86.86                | 12.79          | 86.82          | 86.84          | 86.60                    | 13.05          | 86.56          | 86.58          |
| ResNet-50    | 10     | 89.88                | 9.77           | 89.84          | 89.86          | 95.88                    | 3.77           | 95.84          | 95.86          |
|              |        | ( $\pm 0.04$ )       | ( $\pm 0.04$ ) | ( $\pm 0.04$ ) | ( $\pm 0.04$ ) | ( $\pm 0.04$ )           | ( $\pm 0.04$ ) | ( $\pm 0.04$ ) | ( $\pm 0.03$ ) |
|              | 20     | 90.10                | 9.55           | 90.06          | 90.08          | 96.24                    | 2.41           | 96.20          | 96.22          |
|              |        | ( $\pm 0.04$ )       | ( $\pm 0.05$ ) | ( $\pm 0.04$ ) | ( $\pm 0.05$ ) | ( $\pm 0.04$ )           | ( $\pm 0.04$ ) | ( $\pm 0.04$ ) | ( $\pm 0.03$ ) |
|              | 30     | 93.19                | 6.46           | 93.15          | 93.17          | 96.78                    | 1.87           | 96.74          | 96.76          |
| Inception-V3 | 10     | 93.10                | 6.55           | 93.06          | 93.08          | 95.41                    | 4.24           | 95.37          | 95.39          |
|              |        | ( $\pm 0.04$ )       | ( $\pm 0.04$ ) | ( $\pm 0.04$ ) | ( $\pm 0.03$ ) | ( $\pm 0.04$ )           | ( $\pm 0.04$ ) | ( $\pm 0.04$ ) | ( $\pm 0.03$ ) |
|              | 20     | 94.16                | 5.49           | 94.12          | 94.14          | 96.10                    | 3.55           | 96.06          | 96.08          |
|              |        | ( $\pm 0.04$ )       | ( $\pm 0.05$ ) | ( $\pm 0.04$ ) | ( $\pm 0.03$ ) | ( $\pm 0.04$ )           | ( $\pm 0.04$ ) | ( $\pm 0.04$ ) | ( $\pm 0.03$ ) |
|              | 30     | 94.63                | 5.02           | 94.59          | 94.61          | 98.43                    | 1.22           | 98.39          | 98.41          |
