# Supplementary material
Source: MDPI journal article supplement (https://www.mdpi.com/2076-3417/12/21/10787)
Supplement: s1 [file s1]

**Table S1.** Comparison of CNN models using dataset 2 with respect to accuracy, RMSE, weighted kappa (with standard deviation).

| CNN Model    | Epochs | 70%-30% distribution |                |                | 10-fold cross-validation |                |                |
|--------------|--------|----------------------|----------------|----------------|--------------------------|----------------|----------------|
|              |        | Accuracy (%)         | RMSE           | Weighted Kappa | Accuracy (%)             | RMSE           | Weighted Kappa |
| VGG-19       | 10     | 83.23                | 0.2707         | 0.8188         | 86.73                    | 0.2357         | 0.8538         |
|              |        | ( $\pm 0.04$ )       | ( $\pm 0.05$ ) | ( $\pm 0.04$ ) | ( $\pm 0.03$ )           | ( $\pm 0.04$ ) | ( $\pm 0.03$ ) |
|              | 20     | 84.52                | 0.2578         | 0.8317         | 87.58                    | 0.2272         | 0.8623         |
|              |        | ( $\pm 0.04$ )       | ( $\pm 0.06$ ) | ( $\pm 0.04$ ) | ( $\pm 0.03$ )           | ( $\pm 0.04$ ) | ( $\pm 0.03$ ) |
|              | 30     | 84.62                | 0.2568         | 0.8327         | 87.95                    | 0.2235         | 0.8660         |
|              |        | ( $\pm 0.04$ )       | ( $\pm 0.05$ ) | ( $\pm 0.04$ ) | ( $\pm 0.03$ )           | ( $\pm 0.04$ ) | ( $\pm 0.03$ ) |
| ResNet-50    | 10     | 92.28                | 0.1802         | 0.9093         | 95.34                    | 0.1496         | 0.9399         |
|              |        | ( $\pm 0.04$ )       | ( $\pm 0.04$ ) | ( $\pm 0.04$ ) | ( $\pm 0.04$ )           | ( $\pm 0.04$ ) | ( $\pm 0.03$ ) |
|              | 20     | 92.74                | 0.1756         | 0.9139         | 95.89                    | 0.1441         | 0.9454         |
|              |        | ( $\pm 0.05$ )       | ( $\pm 0.05$ ) | ( $\pm 0.04$ ) | ( $\pm 0.04$ )           | ( $\pm 0.04$ ) | ( $\pm 0.03$ ) |
|              | 30     | 93.86                | 0.1644         | 0.9251         | 96.34                    | 0.1296         | 0.9599         |
|              |        | ( $\pm 0.04$ )       | ( $\pm 0.03$ ) | ( $\pm 0.04$ ) | ( $\pm 0.04$ )           | ( $\pm 0.04$ ) | ( $\pm 0.03$ ) |
| Inception-V3 | 10     | 94.32                | 0.1598         | 0.9297         | 97.25                    | 0.1305         | 0.9590         |
|              |        | ( $\pm 0.04$ )       | ( $\pm 0.04$ ) | ( $\pm 0.04$ ) | ( $\pm 0.03$ )           | ( $\pm 0.04$ ) | ( $\pm 0.05$ ) |
|              | 20     | 96.21                | 0.1409         | 0.9486         | 98.27                    | 0.1203         | 0.9692         |
|              |        | ( $\pm 0.03$ )       | ( $\pm 0.04$ ) | ( $\pm 0.04$ ) | ( $\pm 0.03$ )           | ( $\pm 0.04$ ) | ( $\pm 0.05$ ) |
|              | 30     | 96.73                | 0.1357         | 0.9538         | 98.73                    | 0.1157         | 0.9738         |
|              |        | ( $\pm 0.03$ )       | ( $\pm 0.04$ ) | ( $\pm 0.04$ ) | ( $\pm 0.05$ )           | ( $\pm 0.04$ ) | ( $\pm 0.05$ ) |

**Table S2.** Comparison of CNN models using dataset 2 with respect to TP-Rate/Recall, FP-Rate, F-measure (with standard deviation).

| CNN Model    | Epochs | 70%-30% distribution |                |                |                | 10-fold cross-validation |                |                |                |
|--------------|--------|----------------------|----------------|----------------|----------------|--------------------------|----------------|----------------|----------------|
|              |        | TP-Rate / Recall (%) | FP-Rate (%)    | Precision (%)  | F-measure (%)  | TP-Rate / Recall (%)     | FP-Rate (%)    | Precision (%)  | F-measure (%)  |
| VGG-19       | 10     | 82.88                | 16.77          | 82.84          | 82.86          | 86.38                    | 13.27          | 86.34          | 86.36          |
|              |        | ( $\pm 0.03$ )       | ( $\pm 0.04$ ) | ( $\pm 0.04$ ) | ( $\pm 0.04$ ) | ( $\pm 0.04$ )           | ( $\pm 0.04$ ) | ( $\pm 0.04$ ) | ( $\pm 0.04$ ) |
|              | 20     | 84.17                | 15.48          | 84.13          | 84.15          | 87.23                    | 12.42          | 87.19          | 87.21          |
|              |        | ( $\pm 0.05$ )       | ( $\pm 0.03$ ) | ( $\pm 0.04$ ) | ( $\pm 0.04$ ) | ( $\pm 0.04$ )           | ( $\pm 0.04$ ) | ( $\pm 0.05$ ) | ( $\pm 0.03$ ) |
|              | 30     | 84.27                | 15.38          | 84.23          | 84.25          | 87.60                    | 12.05          | 87.56          | 87.58          |
|              |        | ( $\pm 0.04$ )       | ( $\pm 0.04$ ) | ( $\pm 0.04$ ) | ( $\pm 0.04$ ) | ( $\pm 0.04$ )           | ( $\pm 0.05$ ) | ( $\pm 0.05$ ) | ( $\pm 0.03$ ) |
| ResNet-50    | 10     | 91.93                | 7.72           | 91.89          | 91.91          | 94.99                    | 4.66           | 94.95          | 94.97          |
|              |        | ( $\pm 0.04$ )       | ( $\pm 0.05$ ) | ( $\pm 0.04$ ) | ( $\pm 0.04$ ) | ( $\pm 0.03$ )           | ( $\pm 0.04$ ) | ( $\pm 0.04$ ) | ( $\pm 0.03$ ) |
|              | 20     | 92.39                | 7.26           | 92.35          | 92.37          | 95.54                    | 4.11           | 95.50          | 95.52          |
|              |        | ( $\pm 0.04$ )       | ( $\pm 0.04$ ) | ( $\pm 0.04$ ) | ( $\pm 0.04$ ) | ( $\pm 0.04$ )           | ( $\pm 0.04$ ) | ( $\pm 0.04$ ) | ( $\pm 0.03$ ) |
|              | 30     | 93.51                | 6.14           | 93.47          | 93.49          | 96.99                    | 2.66           | 96.95          | 96.97          |
|              |        | ( $\pm 0.05$ )       | ( $\pm 0.04$ ) | ( $\pm 0.04$ ) | ( $\pm 0.04$ ) | ( $\pm 0.04$ )           | ( $\pm 0.04$ ) | ( $\pm 0.04$ ) | ( $\pm 0.04$ ) |
| Inception-V3 | 10     | 93.97                | 5.68           | 93.93          | 93.95          | 96.90                    | 2.75           | 96.86          | 96.88          |
|              |        | ( $\pm 0.04$ )       | ( $\pm 0.04$ ) | ( $\pm 0.04$ ) | ( $\pm 0.04$ ) | ( $\pm 0.04$ )           | ( $\pm 0.04$ ) | ( $\pm 0.04$ ) | ( $\pm 0.03$ ) |
|              | 20     | 95.86                | 3.79           | 95.82          | 95.84          | 97.92                    | 1.73           | 97.88          | 97.90          |
|              |        | ( $\pm 0.04$ )       | ( $\pm 0.04$ ) | ( $\pm 0.04$ ) | ( $\pm 0.04$ ) | ( $\pm 0.04$ )           | ( $\pm 0.04$ ) | ( $\pm 0.04$ ) | ( $\pm 0.03$ ) |
|              | 30     | 96.38                | 3.27           | 96.34          | 96.36          | 98.38                    | 1.27           | 98.34          | 98.36          |
|              |        | ( $\pm 0.04$ )       | ( $\pm 0.05$ ) | ( $\pm 0.05$ ) | ( $\pm 0.04$ ) | ( $\pm 0.05$ )           | ( $\pm 0.04$ ) | ( $\pm 0.04$ ) | ( $\pm 0.04$ ) |
