# Supplementary material
Source: MDPI journal article supplement (https://www.mdpi.com/2076-3417/12/21/10787)
Supplement: s1 [file s1]

**Table S1.** Comparison of CNN models using dataset 3 with respect to accuracy, RMSE, weighted kappa (with standard deviation).

| CNN Model    | Epochs | 70%-30% distribution |                |                | 10-fold cross-validation |                |                |
|--------------|--------|----------------------|----------------|----------------|--------------------------|----------------|----------------|
|              |        | Accuracy (%)         | RMSE           | Weighted Kappa | Accuracy (%)             | RMSE           | Weighted Kappa |
| VGG-19       | 10     | 83.34                | 0.2696         | 0.8199         | 85.64                    | 0.2466         | 0.8429         |
|              |        | ( $\pm 0.04$ )       | ( $\pm 0.04$ ) | ( $\pm 0.03$ ) | ( $\pm 0.04$ )           | ( $\pm 0.04$ ) | ( $\pm 0.03$ ) |
|              | 20     | 84.65                | 0.2565         | 0.8330         | 86.12                    | 0.2418         | 0.8477         |
|              |        | ( $\pm 0.04$ )       | ( $\pm 0.04$ ) | ( $\pm 0.03$ ) | ( $\pm 0.04$ )           | ( $\pm 0.04$ ) | ( $\pm 0.03$ ) |
|              | 30     | 88.52                | 0.2178         | 0.8717         | 88.32                    | 0.2198         | 0.8697         |
|              |        | ( $\pm 0.04$ )       | ( $\pm 0.04$ ) | ( $\pm 0.03$ ) | ( $\pm 0.04$ )           | ( $\pm 0.04$ ) | ( $\pm 0.03$ ) |
| ResNet-50    | 10     | 92.39                | 0.1791         | 0.9104         | 93.25                    | 0.1705         | 0.9190         |
|              |        | ( $\pm 0.05$ )       | ( $\pm 0.04$ ) | ( $\pm 0.04$ ) | ( $\pm 0.04$ )           | ( $\pm 0.04$ ) | ( $\pm 0.04$ ) |
|              | 20     | 93.47                | 0.1683         | 0.9212         | 94.13                    | 0.1617         | 0.9278         |
|              |        | ( $\pm 0.04$ )       | ( $\pm 0.05$ ) | ( $\pm 0.04$ ) | ( $\pm 0.05$ )           | ( $\pm 0.04$ ) | ( $\pm 0.03$ ) |
|              | 30     | 93.89                | 0.1641         | 0.9254         | 95.54                    | 0.1276         | 0.9619         |
|              |        | ( $\pm 0.04$ )       | ( $\pm 0.06$ ) | ( $\pm 0.04$ ) | ( $\pm 0.04$ )           | ( $\pm 0.04$ ) | ( $\pm 0.04$ ) |
| Inception-V3 | 10     | 94.52                | 0.1578         | 0.9317         | 97.39                    | 0.1291         | 0.9604         |
|              |        | ( $\pm 0.04$ )       | ( $\pm 0.04$ ) | ( $\pm 0.03$ ) | ( $\pm 0.03$ )           | ( $\pm 0.04$ ) | ( $\pm 0.03$ ) |
|              | 20     | 95.24                | 0.1506         | 0.9389         | 98.54                    | 0.1176         | 0.9719         |
|              |        | ( $\pm 0.04$ )       | ( $\pm 0.04$ ) | ( $\pm 0.03$ ) | ( $\pm 0.04$ )           | ( $\pm 0.04$ ) | ( $\pm 0.03$ ) |
|              | 30     | 95.37                | 0.1493         | 0.9402         | 98.62                    | 0.1168         | 0.9727         |
|              |        | ( $\pm 0.05$ )       | ( $\pm 0.04$ ) | ( $\pm 0.03$ ) | ( $\pm 0.04$ )           | ( $\pm 0.04$ ) | ( $\pm 0.03$ ) |

**Table S2.** Comparison of CNN models using dataset 3 with respect to TP-Rate/Recall, FP-Rate, F-measure (with standard deviation).

| CNN Model    | Epochs | 70%-30% distribution |                |                |                | 10-fold cross-validation |                |                |                |
|--------------|--------|----------------------|----------------|----------------|----------------|--------------------------|----------------|----------------|----------------|
|              |        | TP-Rate / Recall (%) | FP-Rate (%)    | Precision (%)  | F-measure (%)  | TP-Rate / Recall (%)     | FP-Rate (%)    | Precision (%)  | F-measure (%)  |
| VGG-19       | 10     | 82.99                | 16.66          | 82.95          | 82.97          | 85.29                    | 14.36          | 85.25          | 85.27          |
|              |        | ( $\pm 0.04$ )       | ( $\pm 0.04$ ) | ( $\pm 0.04$ ) | ( $\pm 0.03$ ) | ( $\pm 0.04$ )           | ( $\pm 0.04$ ) | ( $\pm 0.04$ ) | ( $\pm 0.03$ ) |
|              | 20     | 84.30                | 15.35          | 84.26          | 84.28          | 85.77                    | 13.88          | 85.73          | 85.75          |
|              |        | ( $\pm 0.05$ )       | ( $\pm 0.04$ ) | ( $\pm 0.04$ ) | ( $\pm 0.03$ ) | ( $\pm 0.04$ )           | ( $\pm 0.04$ ) | ( $\pm 0.04$ ) | ( $\pm 0.03$ ) |
|              | 30     | 88.17                | 11.48          | 88.13          | 88.15          | 87.97                    | 11.68          | 87.93          | 87.95          |
|              |        | ( $\pm 0.04$ )       | ( $\pm 0.04$ ) | ( $\pm 0.04$ ) | ( $\pm 0.03$ ) | ( $\pm 0.04$ )           | ( $\pm 0.04$ ) | ( $\pm 0.04$ ) | ( $\pm 0.03$ ) |
| ResNet-50    | 10     | 92.04                | 7.61           | 92.00          | 92.02          | 92.90                    | 6.75           | 92.86          | 92.88          |
|              |        | ( $\pm 0.04$ )       | ( $\pm 0.04$ ) | ( $\pm 0.04$ ) | ( $\pm 0.03$ ) | ( $\pm 0.04$ )           | ( $\pm 0.04$ ) | ( $\pm 0.04$ ) | ( $\pm 0.03$ ) |
|              | 20     | 93.12                | 6.53           | 93.08          | 93.10          | 93.78                    | 5.87           | 93.74          | 93.76          |
|              |        | ( $\pm 0.05$ )       | ( $\pm 0.04$ ) | ( $\pm 0.04$ ) | ( $\pm 0.03$ ) | ( $\pm 0.04$ )           | ( $\pm 0.04$ ) | ( $\pm 0.04$ ) | ( $\pm 0.03$ ) |
|              | 30     | 93.54                | 6.11           | 93.50          | 93.52          | 95.19                    | 2.46           | 95.15          | 95.17          |
|              |        | ( $\pm 0.04$ )       | ( $\pm 0.04$ ) | ( $\pm 0.04$ ) | ( $\pm 0.03$ ) | ( $\pm 0.04$ )           | ( $\pm 0.04$ ) | ( $\pm 0.04$ ) | ( $\pm 0.03$ ) |
| Inception-V3 | 10     | 94.17                | 5.48           | 94.13          | 94.15          | 97.04                    | 2.61           | 97.00          | 97.02          |
|              |        | ( $\pm 0.04$ )       | ( $\pm 0.04$ ) | ( $\pm 0.04$ ) | ( $\pm 0.03$ ) | ( $\pm 0.04$ )           | ( $\pm 0.04$ ) | ( $\pm 0.04$ ) | ( $\pm 0.03$ ) |
|              | 20     | 94.89                | 4.76           | 94.85          | 94.87          | 98.19                    | 1.46           | 98.15          | 98.17          |
|              |        | ( $\pm 0.05$ )       | ( $\pm 0.04$ ) | ( $\pm 0.04$ ) | ( $\pm 0.03$ ) | ( $\pm 0.04$ )           | ( $\pm 0.04$ ) | ( $\pm 0.04$ ) | ( $\pm 0.03$ ) |
|              | 30     | 95.02                | 4.63           | 94.98          | 95.00          | 98.27                    | 1.38           | 98.23          | 98.25          |
|              |        | ( $\pm 0.04$ )       | ( $\pm 0.04$ ) | ( $\pm 0.04$ ) | ( $\pm 0.03$ ) | ( $\pm 0.04$ )           | ( $\pm 0.04$ ) | ( $\pm 0.04$ ) | ( $\pm 0.03$ ) |
